# Supplementary material for: p-Type electronic conductivity, oxygen permeability and stability of La2Ni0.9Co0.1O4+δElectronic supplementary infromation (ESI) available: further experimental data for the oxygen permeability, total conductivity and Seebeck coefficient of La2Ni0.9Co0.1O4+δ. See http://www.rsc.org/suppdata/jm/b3/b300357d/
Source: Royal Society of Chemistry journal article supplement (doi:10.1039/b300357d), 2003-03-27

Fig.S1. Oxygen hyperstoichiometry of La2Ni0.9Co0.1O4+ estimated from Seebeck coefficient data.

Fig.S2. Dependence of the total conductivity of La2Ni0.9Co0.1O4+ on the oxygen nonstoichiometry.

Fig.S3. Specific oxygen permeability of La2Ni0.9Co0.1O4+ membranes under high oxygen partial pressure gradients.


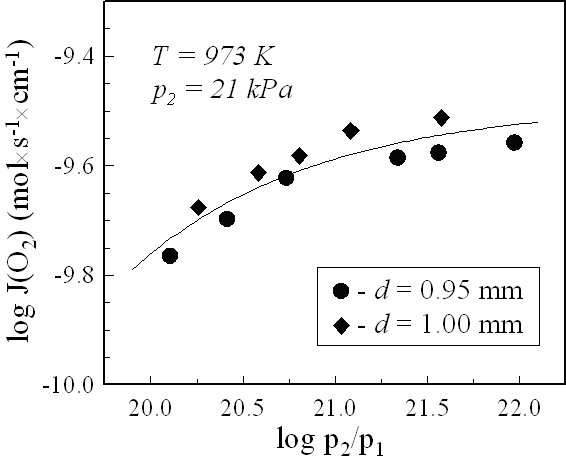

Supplement: b300357d.doc [file b300357d.doc]
